# Supplementary material for: Prediction of Carbohydrate-Binding Proteins from Sequences Using Support Vector Machines
Source: Hindawi journal article supplement (doi:10.1155/2010/289301), 2010-09-27
Supplement: f1 [file 289301.f1.pdf]

| CDD ID     | Number of hits | Description of domains                                                     |
|------------|----------------|----------------------------------------------------------------------------|
| smart00034 | 16             | C-type lectin (CTL) or carbohydrate-recognition domain (CRD)               |
| cd03593    | 13             | CLECT_NK_receptors_like                                                    |
| cd03590    | 11             | CLECT_DC-SIGN_like                                                         |
| cd00037    | 10             | CLECT: C-type lectin (CTL)/C-type lectin-like (CTLD) domain                |
| cd00070    | 7              | Galectin/galactose-binding lectin                                          |
| cd03588    | 5              | CLECT_CSPGs                                                                |
| pfam00337  | 5              | Galactoside-binding lectin                                                 |
| smart00494 | 5              | Chitin-binding domain type 2                                               |
| pfam00139  | 4              | Legume lectin domain                                                       |
| pfam01419  | 4              | Jacalin-like lectin domain                                                 |
| pfam03388  | 4              | Legume-like lectin family                                                  |
| pfam00652  | 4              | Ricin-type beta-trefoil lectin domain                                      |
| cd03589    | 4              | CLECT_CEL-1_like                                                           |
| cd03592    | 3              | CLECT_selectins_like                                                       |
| cd00161    | 3              | Ricin-type beta-trefoil                                                    |
| cd00087    | 3              | Fibrinogen-related domains (FReDs)                                         |
| COG1196    | 3              | Chromosome segregation ATPases (Cell division and chromosome partitioning) |
| pfam00059  | 3              | Lectin C-type domain                                                       |
| cd00190    | 3              | Trypsin-like serine protease                                               |
| smart00276 | 3              | Galectin                                                                   |
| cd03591    | 3              | CLECT_collectin_like                                                       |
| cd00028    | 2              | Bulb-type mannose-specific lectin                                          |
| pfam00167  | 2              | Fibroblast growth factor                                                   |
| pfam00262  | 2              | Calreticulin family                                                        |
| smart00125 | 2              | Interleukin-1 homologues                                                   |
| smart00020 | 2              | Trypsin-like serine protease                                               |
| pfam07686  | 2              | Immunoglobulin V-set domain                                                |
| pfam01442  | 2              | Apolipoprotein A1/A4/E domain                                              |
| cd03516    | 2              | This domain is a hyaluronan (HA)-binding domain                            |
| smart00636 | 2              | Glyco_18 domain                                                            |
| smart00607 | 2              | eel-Fucolectin Tachylectin-4 Pentaxrin-1 Domain                            |
| pfam02059  | 2              | Interleukin-3                                                              |
| pfam00354  | 2              | Pentaxin family                                                            |
| pfam04774  | 2              | Hyaluronan / mRNA binding family                                           |
| cd04273    | 2              | Zinc-dependent metalloprotease                                             |
| cd03600    | 2              | CLECT_thrombomodulin_like                                                  |
| pfam07679  | 2              | Immunoglobulin I-set domain                                                |
| pfam08205  | 2              | CD80-like C2-set immunoglobulin domain                                     |
| cd03515    | 2              | ink_domain_TSG_6_like                                                      |
| pfam01179  | 2              | Copper amine oxidase                                                       |
| smart00458 | 2              | Ricin-type beta-trefoil                                                    |
| smart00706 | 2              | Beta propeller repeats in Physarum polycephalum tectonins                  |
| cd03594    | 2              | CLECT_REG-1_like                                                           |
| cd00033    | 2              | Domain abundant in complement control proteins                             |

|            |   |                                                                                                  |
|------------|---|--------------------------------------------------------------------------------------------------|
| cd00035    | 2 | Chitin binding domain                                                                            |
| pfam07938  | 2 | Fungal fucose-specific lectin                                                                    |
| pfam00386  | 2 | C1q domain                                                                                       |
| pfam00041  | 2 | Fibronectin type III domain                                                                      |
| pfam01453  | 2 | D-mannose binding lectin                                                                         |
| pfam00715  | 1 | Interleukin 2                                                                                    |
| pfam00489  | 1 | Interleukin-6/G-CSF/MGF family                                                                   |
| pfam00727  | 1 | Interleukin 4                                                                                    |
| pfam02140  | 1 | Galactose binding lectin domain                                                                  |
| pfam00151  | 1 | Lipase                                                                                           |
| smart00141 | 1 | Platelet-derived and vascular endothelial growth factors (PDGF)                                  |
| cd00931    | 1 | Immunoglobulin domain cell adhesion molecule (cam) subfamily                                     |
| smart00193 | 1 | Pleiotrophin / midkine family                                                                    |
| smart00199 | 1 | Intercrine alpha family (small cytokine C-X-C) (chemokine CXC)                                   |
| pfam02354  | 1 | Latrophilin Cytoplasmic C-terminal region                                                        |
| smart00058 | 1 | Fibronectin type 1 domain                                                                        |
| pfam00007  | 1 | Cystine-knot domain                                                                              |
| cd00273    | 1 | Chemokine_CXC                                                                                    |
| pfam05735  | 1 | Thrombospondin C-terminal region                                                                 |
| pfam02177  | 1 | Amyloid A4 extracellular domain                                                                  |
| cd00041    | 1 | CUB domain                                                                                       |
| pfam04881  | 1 | Adenovirus GP19K                                                                                 |
| smart00409 | 1 | Immunoglobulin                                                                                   |
| pfam09014  | 1 | Beta-2-glycoprotein-1 fifth domain                                                               |
| cd01328    | 1 | Follistatin-like SPARC (secreted protein)                                                        |
| pfam01776  | 1 | Ribosomal L22e protein family                                                                    |
| pfam05927  | 1 | Penaeidin                                                                                        |
| pfam00147  | 1 | Fibrinogen beta and gamma chains                                                                 |
| cd03597    | 1 | CLECT_attractin_like                                                                             |
| cd02045    | 1 | Antithrombin is a serine proteinase inhibitor (serpin) which controls the process of coagulation |
| cd03595    | 1 | CLECT_chondrolectin_like                                                                         |
| cd03596    | 1 | CLECT_tetranectin_like                                                                           |
| pfam00431  | 1 | CUB domain                                                                                       |
| cd03601    | 1 | CLECT_TC14_like                                                                                  |
| smart00038 | 1 | Fibrillar collagens C-terminal domain                                                            |
| pfam00030  | 1 | Beta/Gamma crystallin                                                                            |
| smart00200 | 1 | Domain found in sea urchin sperm protein                                                         |
| smart00202 | 1 | Scavenger receptor Cys-rich                                                                      |
| smart00198 | 1 | SCP / Tpx-1 / Ag5 / PR-1 / Sc7 family of extracellular domains                                   |
| cd02047    | 1 | Heparin cofactor II (HCII) inhibits thrombin                                                     |
| cd00094    | 1 | Hemopexin-like repeats                                                                           |
| cd00057    | 1 | Coagulation factor 5/8 C-terminal domain                                                         |
| pfam00855  | 1 | PWWP domain                                                                                      |

|            |   |                                                                                                                                                                                        |
|------------|---|----------------------------------------------------------------------------------------------------------------------------------------------------------------------------------------|
| smart00281 | 1 | Laminin B domain                                                                                                                                                                       |
| pfam06668  | 1 | Inter-alpha-trypsin inhibitor heavy chain C-terminus                                                                                                                                   |
| smart00219 | 1 | Tyrosine kinase                                                                                                                                                                        |
| pfam00031  | 1 | Cystatin domain                                                                                                                                                                        |
| pfam07915  | 1 | Glucosidase II beta subunit-like protein                                                                                                                                               |
| smart00159 | 1 | Pentraxin / C-reactive protein / pentaxin family                                                                                                                                       |
| cd02051    | 1 | Plasminogen activator inhibitor-1_like                                                                                                                                                 |
| pfam06401  | 1 | Alpha-2-macroglobulin RAP                                                                                                                                                              |
| cd01100    | 1 | Subfamily of PAN/APPLE-like domains                                                                                                                                                    |
| pfam07367  | 1 | Fungal fruit body lectin                                                                                                                                                               |
| pfam09458  | 1 | H-type lectin domain                                                                                                                                                                   |
| smart00638 | 1 | Lipoprotein N-terminal Domain                                                                                                                                                          |
| smart00408 | 1 | Immunoglobulin C-2 Type                                                                                                                                                                |
| pfam02469  | 1 | Fasciclin domain                                                                                                                                                                       |
| smart00006 | 1 | amyloid A4                                                                                                                                                                             |
| cd03599    | 1 | CLECT_DGCR2_like: C-type lectin-like domain (CTLD) of the type found in DGCR2                                                                                                          |
| pfam00100  | 1 | Zona pellucida-like domain                                                                                                                                                             |
| cd03576    | 1 | NTR domain                                                                                                                                                                             |
| pfam08531  | 1 | Alpha-L-rhamnosidase N-terminal domain                                                                                                                                                 |
| pfam00191  | 1 | Annexin                                                                                                                                                                                |
| pfam04300  | 1 | F-box associated region                                                                                                                                                                |
| pfam03498  | 1 | Cytolethal distending toxin A/C family                                                                                                                                                 |
| smart00059 | 1 | Fibronectin type 2 domain                                                                                                                                                              |
| pfam00379  | 1 | Insect cuticle protein                                                                                                                                                                 |
| pfam07472  | 1 | Fucose-binding lectin II (PA-III)                                                                                                                                                      |
| smart00216 | 1 | von Willebrand factor (vWF) type D domain                                                                                                                                              |
| pfam06010  | 1 | Domain of Unknown Function (DUF906)                                                                                                                                                    |
| pfam03146  | 1 | Agrin NtA domain                                                                                                                                                                       |
| smart00282 | 1 | Laminin G domain                                                                                                                                                                       |
| pfam00839  | 1 | Cysteine rich repeat                                                                                                                                                                   |
| cd00078    | 1 | HECT domain                                                                                                                                                                            |
| cd03520    | 1 | Link_domain_CSPGs_modules_2_4                                                                                                                                                          |
| pfam07968  | 1 | Leukocidin/Hemolysin toxin family                                                                                                                                                      |
| cd01477    | 1 | VWA F09G8                                                                                                                                                                              |
| cd01471    | 1 | Micronemal proteins                                                                                                                                                                    |
| COG5126    | 1 | Ca <sup>2+</sup> -binding protein (EF-Hand superfamily) [Signal transduction mechanisms / Cytoskeleton / Cell division and chromosome partitioning / General function prediction only] |
| cd04280    | 1 | Zinc-dependent metalloprotease                                                                                                                                                         |
| smart00360 | 1 | RNA recognition motif                                                                                                                                                                  |
| cd01450    | 1 | Von Willebrand factor type A (vWA) domain was originally found in the blood coagulation protein von Willebrand factor (vWF)                                                            |
| pfam01607  | 1 | Chitin binding Peritrophin-A domain                                                                                                                                                    |
| cd00118    | 1 | Lysin domain                                                                                                                                                                           |
| cd00083    | 1 | Helix-loop-helix domain                                                                                                                                                                |

|            |   |                                                                  |
|------------|---|------------------------------------------------------------------|
| pfam09222  | 1 | Fimbrial adhesin F17-AG                                          |
| cd03602    | 1 | CLECT_1                                                          |
| pfam09160  | 1 | FimH                                                             |
| pfam08277  | 1 | PAN-like domain                                                  |
| pfam02330  | 1 | Mitochondrial glycoprotein                                       |
| cd00241    | 1 | Cellobiose dehydrogenase (CellobioseDH)                          |
| pfam00282  | 1 | Pyridoxal-dependent decarboxylase conserved domain               |
| pfam00080  | 1 | Copper/zinc superoxide dismutase (SODC)                          |
| pfam06473  | 1 | FGF binding protein 1 (FGF-BP1)                                  |
| smart00637 | 1 | CBD_II domain                                                    |
| smart00236 | 1 | Fungal-type cellulose-binding domain                             |
| cd00062    | 1 | Fibronectin Type II domain                                       |
| cd00054    | 1 | Calcium-binding EGF-like domain                                  |
| pfam05963  | 1 | Cytomegalovirus US3 protein                                      |
| COG2217    | 1 | Cation transport ATPase [Inorganic ion transport and metabolism] |
| pfam01779  | 1 | Ribosomal L29e protein family                                    |
| pfam00068  | 1 | Phospholipase A2                                                 |
| pfam00074  | 1 | Pancreatic ribonuclease                                          |
| pfam07828  | 1 | PA-IL-like protein                                               |
| pfam09259  | 1 | Fungal immunomodulatory protein Fve                              |
| cd00061    | 1 | Fibronectin type 1 domain                                        |

Table S1 Domains found in the positive dataset.
